# Supplementary material for: Tissue-specific distribution of hemicelluloses in six different sugarcane hybrids as related to cell wall recalcitrance
Source: PubMed Central journal article supplement (PMC4855430; doi:10.1186/s13068-016-0513-2), 2016-05-04
Supplement: 13068_2016_513_MOESM1_ESM.pdf [file 13068_2016_513_MOESM1_ESM.pdf]

**Table S1.** Monomeric sugars released from internode fractions from six different sugarcane hybrids after mild hydrolysis with 2 mol.L<sup>-1</sup> trifluoroacetic acid (TFA)

| Sugarcane hybrids | Internode region | Monomeric sugars released by mild TFA hydrolysis (% , w/w on oven dry basis) |           |           |            |            |                   |                 |
|-------------------|------------------|------------------------------------------------------------------------------|-----------|-----------|------------|------------|-------------------|-----------------|
|                   |                  | Rhamnose                                                                     | Arabinose | Galactose | Glucose    | Xylose     | Galacturonic acid | Glucuronic acid |
| H 89              | Pith             | 0.15 ± 0.02                                                                  | 3.2 ± 0.6 | 0.8 ± 0.2 | 12 ± 2     | 11 ± 2     | 0.5 ± 0.1         | trace           |
|                   | Interface        | 0.14 ± 0.01                                                                  | 2.7 ± 0.1 | 0.6 ± 0.1 | 8.8 ± 0.8  | 12.6 ± 0.5 | 0.4 ± 0.1         | trace           |
|                   | Rind             | 0.09 ± 0.01                                                                  | 1.9 ± 0.1 | 0.3 ± 0.1 | 4.3 ± 0.4  | 15 ± 1     | 0.4 ± 0.1         | nd              |
| H 146             | Pith             | 0.17 ± 0.04                                                                  | 3.7 ± 0.7 | 0.9 ± 0.2 | 12.3 ± 0.2 | 9 ± 1      | 0.7 ± 0.1         | trace           |
|                   | Interface        | 0.11 ± 0.01                                                                  | 2.6 ± 0.2 | 0.6 ± 0.1 | 8.7 ± 0.7  | 13 ± 1     | 0.5 ± 0.1         | trace           |
|                   | Rind             | nd                                                                           | 1.9 ± 0.2 | 0.3 ± 0.1 | 2.7 ± 0.9  | 14 ± 1     | 0.3 ± 0.1         | nd              |
| H 58              | Pith             | 0.13 ± 0.02                                                                  | 2.9 ± 0.1 | 0.7 ± 0.1 | 6.3 ± 0.2  | 15.2 ± 0.9 | 0.5 ± 0.1         | trace           |
|                   | Interface        | 0.09 ± 0.04                                                                  | 2.3 ± 0.7 | 0.4 ± 0.1 | 1.9 ± 0.5  | 16 ± 4     | 0.5 ± 0.1         | nd              |
|                   | Rind             | 0.09 ± 0.01                                                                  | 2.1 ± 0.1 | 0.3 ± 0.1 | 0.9 ± 0.2  | 17.4 ± 0.7 | 0.4 ± 0.1         | nd              |
| H 166             | Pith             | 0.16 ± 0.03                                                                  | 3.4 ± 0.7 | 0.7 ± 0.2 | 8 ± 1      | 15 ± 2     | 0.6 ± 0.1         | trace           |
|                   | Interface        | 0.09 ± 0.01                                                                  | 2.4 ± 0.2 | 0.4 ± 0.1 | 4.1 ± 0.6  | 16 ± 1     | nd                | nd              |
|                   | Rind             | nd                                                                           | 1.7 ± 0.1 | 0.2 ± 0.1 | 2.2 ± 0.4  | 17.2 ± 0.9 | 0.4 ± 0.1         | nd              |
| H 321             | Pith             | 0.12 ± 0.01                                                                  | 2.9 ± 0.1 | 0.7 ± 0.1 | 11.5 ± 0.8 | 13.1 ± 0.6 | 0.5 ± 0.1         | trace           |
|                   | Interface        | 0.09 ± 0.01                                                                  | 2.5 ± 0.1 | 0.4 ± 0.1 | 4.8 ± 0.3  | 16.0 ± 0.9 | 0.4 ± 0.1         | nd              |
|                   | Rind             | 0.07 ± 0.02                                                                  | 1.8 ± 0.3 | 0.3 ± 0.1 | 1.6 ± 0.3  | 15 ± 2     | 0.2 ± 0.1         | nd              |
| H 140             | Pith             | 0.15 ± 0.01                                                                  | 3.9 ± 0.1 | 1.1 ± 0.1 | 9.2 ± 0.3  | 16.2 ± 0.3 | 0.5 ± 0.1         | nd              |
|                   | Interface        | 0.10 ± 0.01                                                                  | 2.8 ± 0.3 | 0.7 ± 0.1 | 4.4 ± 0.9  | 16.5 ± 0.9 | 0.4 ± 0.1         | nd              |
|                   | Rind             | 0.13 ± 0.01                                                                  | 3.0 ± 0.1 | 0.7 ± 0.1 | 4.5 ± 0.5  | 17.9 ± 0.5 | 0.4 ± 0.1         | nd              |

nd = not detected; fucose was not detected in the evaluated samples
