# Supplementary material for: Tissue-specific distribution of hemicelluloses in six different sugarcane hybrids as related to cell wall recalcitrance
Source: PubMed Central journal article supplement (PMC4855430; doi:10.1186/s13068-016-0513-2), 2016-05-04
Supplement: 13068_2016_513_MOESM2_ESM.pdf [file 13068_2016_513_MOESM2_ESM.pdf]

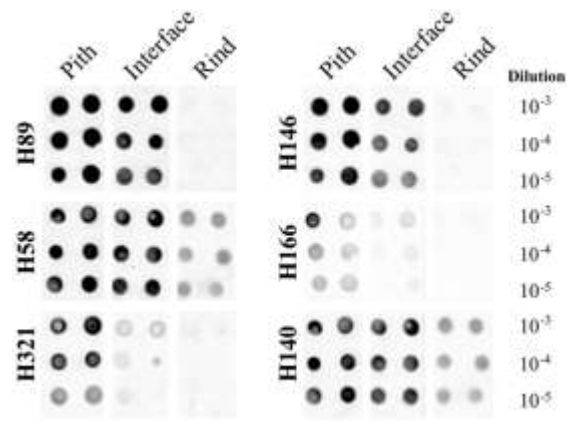

**Fig. S1.** Immunodot analysis with a MLG monoclonal antibody of 4 mol.l<sup>-1</sup>-KOH extracts prepared from internode fractions of six different sugarcane hybrids. For each sample, three different extract dilutions were prepared and assessed in duplicate.
