# Supplementary material for: Tissue-specific distribution of hemicelluloses in six different sugarcane hybrids as related to cell wall recalcitrance
Source: PubMed Central journal article supplement (PMC4855430; doi:10.1186/s13068-016-0513-2), 2016-05-04
Supplement: 13068_2016_513_MOESM3_ESM.pdf [file 13068_2016_513_MOESM3_ESM.pdf]

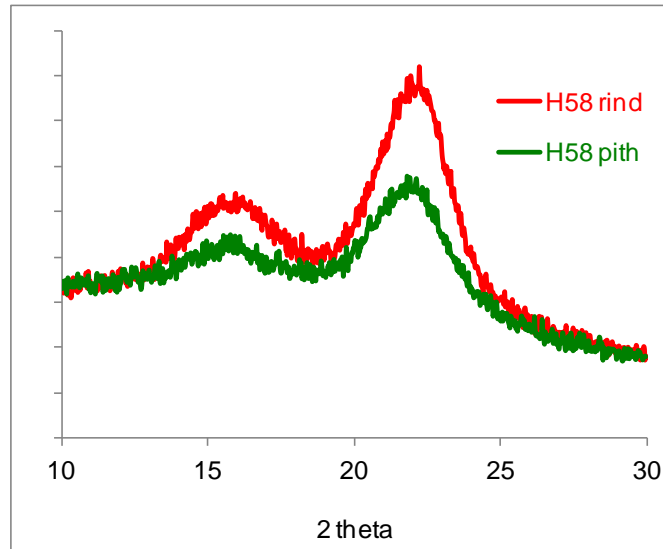

**Fig. S2.** Illustrative X-ray diffraction spectra of the rind (red) and pith (green) regions of the sugarcane hybrid 58.
