# Supplementary material for: Tissue-specific distribution of hemicelluloses in six different sugarcane hybrids as related to cell wall recalcitrance
Source: PubMed Central journal article supplement (PMC4855430; doi:10.1186/s13068-016-0513-2), 2016-05-04
Supplement: 13068_2016_513_MOESM5_ESM.pdf [file 13068_2016_513_MOESM5_ESM.pdf]

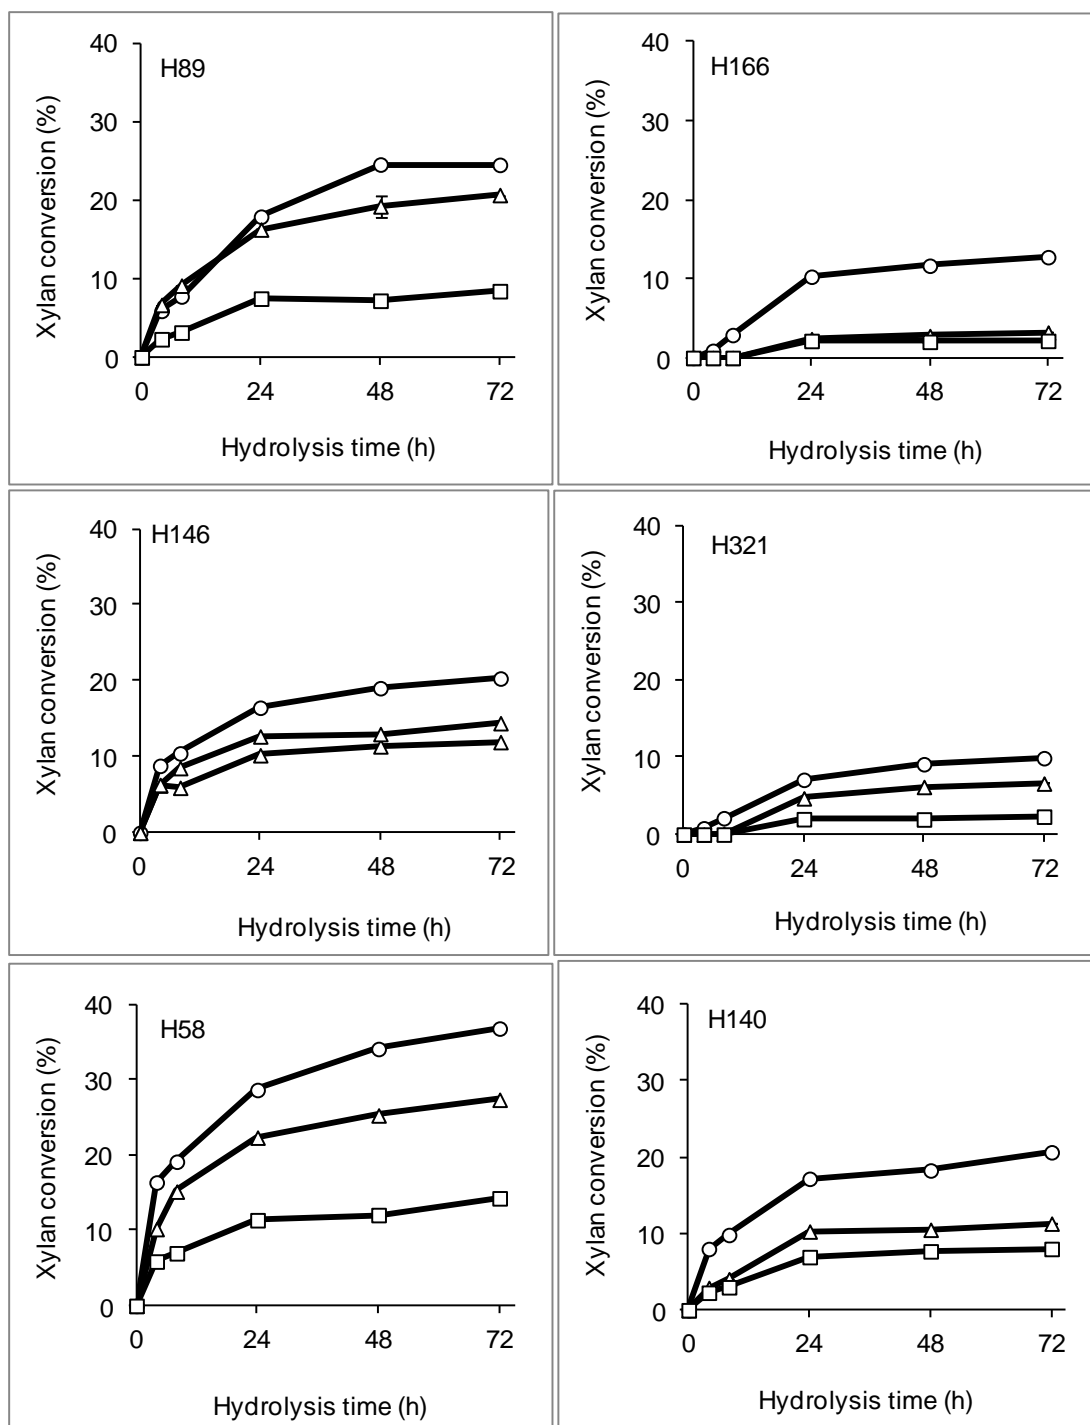

**Fig. S4.** Time-dependence of the enzymatic conversion of xylan to xylose in internode fractions from six different sugarcane hybrids. Error bars represent the standard deviations for triplicate hydrolysis experiments. Symbols: (circles) pith, (triangles) pith-rind interface, (squares) rind.
