# Supplementary material for: Tissue-specific distribution of hemicelluloses in six different sugarcane hybrids as related to cell wall recalcitrance
Source: PubMed Central journal article supplement (PMC4855430; doi:10.1186/s13068-016-0513-2), 2016-05-04
Supplement: 13068_2016_513_MOESM6_ESM.pdf [file 13068_2016_513_MOESM6_ESM.pdf]

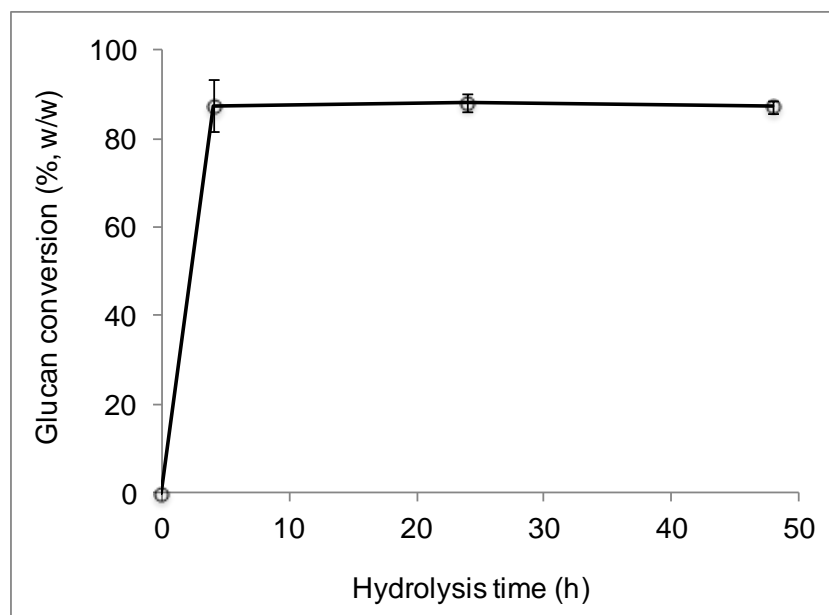

**Fig. S5.** Time dependence of the enzymatic conversion of barley MLG to glucose monomers with commercial enzymes. Error bars represent the standard deviations for triplicate hydrolysis experiments.
